# Supplementary material
Source: publisher site journal article supplement (https://www.dovepress.com/article/569871)

# Supplemental Figure 1.

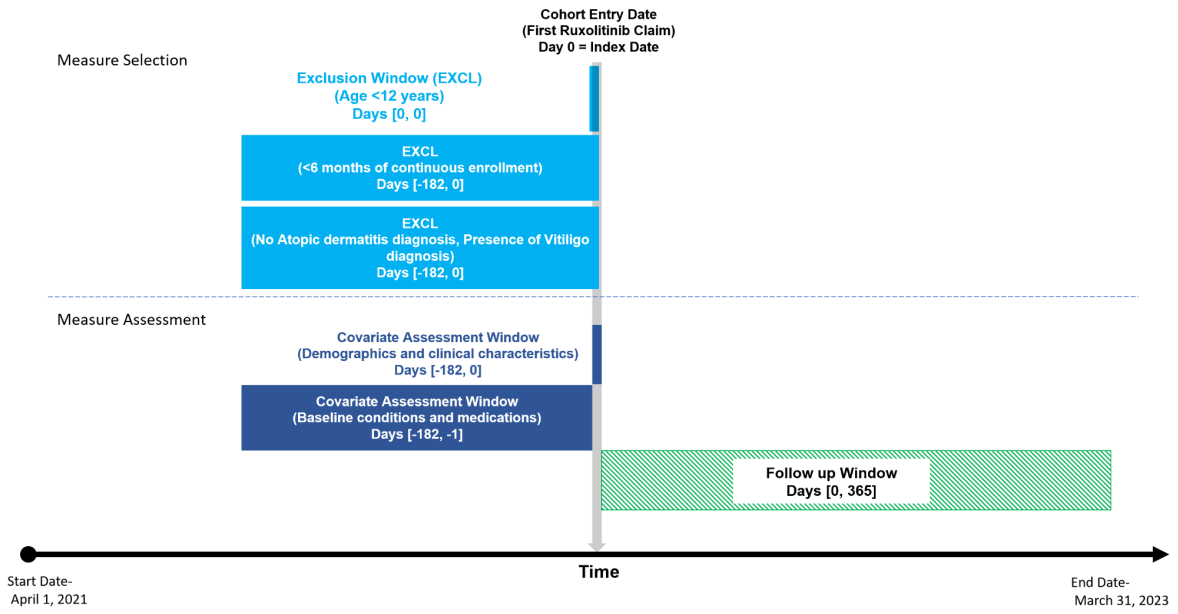

## Study design.

Supplement: Supplementary file 1 [file Supplement.pdf]
